# Supplementary material for: Polyamine Oxidase Expression Is Downregulated by 17β-Estradiol via Estrogen Receptor 2 in Human MCF-7 Breast Cancer Cells
Source: MDPI journal article supplement (doi:10.3390/ijms23147521), 2022-07-07
Supplement: s1 [file s1]

# **Polyamine oxidase expression is downregulated by 17 $\beta$ -estradiol via estrogen receptor 2 in human MCF-7 breast cancer cells**

Jin Hyung Kim<sup>1</sup> and Seung-Taek Lee<sup>1,\*</sup>

<sup>1</sup> Department of Biochemistry, College of Life Science and Biotechnology, Yonsei University, Seoul 03722, Korea; qnt1313@yonsei.ac.kr (J.H.K.)

\* Correspondence: stlee@yonsei.ac.kr; Tel.: +82-2-2123-2703

**Supplementary Table S1.** Primer sequences used for reverse transcription-polymerase chain reaction of *AMD1*, *ODC1*, *SAT1*, *SMOX*, *SMS*, *SRM*, *PAOX*, *GREB1*, and *GAPDH* mRNAs.

| Primer Name <sup>1</sup> | Nucleotide Sequence              | Nucleotide Position | Annealing Temp. (°C) | GenBank Number |
|--------------------------|----------------------------------|---------------------|----------------------|----------------|
| <i>AMD1</i> -F           | 5'-GTGGTTGGAACACTGTTTGACT-3'     | 2945–2966           | 55                   | NM_001634.6    |
| <i>AMD1</i> -R           | 5'-AGGTGCTGTGCTCATTACAGA-3'      | 3056–3036           |                      |                |
| <i>ODC1</i> -F           | 5'-CGGATTGTTGAGCGCTGTGACC-3'     | 1427–1448           | 60                   | NM_002539.3    |
| <i>ODC1</i> -R           | 5'-GGCAGCAGCAACAGTGTAAGCG-3'     | 1516–1495           |                      |                |
| <i>SAT1</i> -F           | 5'-GCAGCAGCATGCACTTCTTGGA-3'     | 544–566             | 60                   | NM_002970.4    |
| <i>SAT1</i> -R           | 5'-AGTCTCCAACCCTCTTCACTGGA-3'    | 646–624             |                      |                |
| <i>SMOX</i> -F           | 5'-ATGCAGGTGCTGTTTTCCGGTGA-3'    | 1710–1732           | 65                   | NM_175839.3    |
| <i>SMOX</i> -R           | 5'-GGTACATCTCAATGAGGCGGGC-3'     | 1818–1797           |                      |                |
| <i>SMS</i> -F            | 5'-ATCTGACAGAAGCACTGTGCTC-3'     | 1075–1097           | 55                   | NM_004595.5    |
| <i>SMS</i> -R            | 5'-TATGAAGGGACACAGACGATCTCC-3'   | 1168–1145           |                      |                |
| <i>SRM</i> -F            | 5'-CAGCAAGAACCCGAGCACGAACT-3'    | 828–850             | 60                   | NM_003132.3    |
| <i>SRM</i> -R            | 5'-GCAAACCTCGGGCAGCACAAAGG-3'    | 956–935             |                      |                |
| <i>PAOX</i> -F           | 5'-AAGAGCGTCCTGCGGTCTCG-3'       | 1313–1332           | 60                   | NM_152911.4    |
| <i>PAOX</i> -R           | 5'-CGTCCGTCGTGGAGTAAACGT-3'      | 1501–1484           |                      |                |
| <i>GREB1</i> -F          | 5'-GCTGGAAAGAGCTAGAAGCACAGTTC-3' | 7722–7747           | 65                   | NM_014668.4    |
| <i>GREB1</i> -R          | 5'-TGGCATTGAGGGTAGGCAAG-3'       | 7813–7794           |                      |                |
| <i>GAPDH</i> -F          | 5'-ACTGCTTAGCACCCCTGGCCA-3'      | 540–560             | 57                   | NM_002046.7    |
| <i>GAPDH</i> -R          | 5'-TTGGCAGTGGGGACACGGAAG-3'      | 792–772             |                      |                |

<sup>1</sup> F: forward primer and R: reverse primer

**Supplementary Table S2.** Primer sequences used for the cloning of PAOX promoter-reporter constructs.

| Primer Name <sup>1</sup> | Nucleotide Sequence <sup>2</sup>                              | Annealing Temp. (°C) |
|--------------------------|---------------------------------------------------------------|----------------------|
| -3126-F                  | 5'- <b>TCTATCGATAGGTACCT</b> GAGGTCAGGTGTT <b>CGAGACC</b> -3' | 65                   |
| -2730-F                  | 5'- <b>TCTATCGATAGGTACCAT</b> GGGTAGTTGCCACCTG-3'             | 65                   |
| -2497-F                  | 5'- <b>TCTATCGATAGGTACCGT</b> GCTATTGGATTCAGGC-3'             | 65                   |
| -1882-F                  | 5'- <b>TCTATCGATAGGTACCTG</b> AAAACAGGGCAGCAGTC-3'            | 65                   |
| -1271-F                  | 5'- <b>TCTATCGATAGGTACCGTT</b> CCCCATGGCCTGGAG-3'             | 65                   |
| -1099-F                  | 5'- <b>TCTATCGATAGGTACCGTT</b> GGCTAGGGAGTGATGG-3'            | 65                   |
| -1027-F                  | 5'- <b>TCTATCGATAGGTACCGGG</b> ACGAGAGGGAATCAAAGG-3'          | 65                   |
| -1003-F                  | 5'- <b>TCTATCGATAGGTACCGT</b> AAGACACGGCTCAGGAG-3'            | 65                   |
| -280-R                   | 5'- <b>CCGGAATGCCAAGCTT</b> GGGGCCGGGCCGAGCCCCAC-3'           | 65                   |

<sup>1</sup> Each primer was named based on the 5'-end nucleotide position of the PAOX promoter that annealed to each primer. The 1st nucleotide upstream of the start codon was referred to as -1. F: forward primer and R: reverse primer.

<sup>2</sup> Sequences annealed to the pGL3 vector and corresponding to the restriction site (GGTACC or AAGCTT) are shown in bold and italics, respectively.

**Supplementary Table S3.** Primer sequences used for mutagenesis of AP-1 sites in the PAOX promoter-reporter constructs.

| Primer Name <sup>1</sup> | Nucleotide Sequence <sup>2</sup>    | Nucleotide Position <sup>3</sup> | Annealing Temp. (°C) |
|--------------------------|-------------------------------------|----------------------------------|----------------------|
| mAP-1-D-F                | 5'-ATGAACAAGCC <u>AAGTCTT</u> GT    | -2718~-2758                      | 65                   |
|                          | CAAAGCCACATGGGTAGTTG-3'             |                                  |                      |
| mAP-1-D-R                | 5'-TGTGGCTTTGATA <u>AAGACTT</u> GGC | -2772~-2728                      | 65                   |
|                          | TTGTTTCATTTTTTTAAAATAGCT-3'         |                                  |                      |
| mAP-1-P-F                | 5'-GCCCAGA <u>AAGACTT</u> GC        | -1134~-1164                      | 65                   |
|                          | CCGACTCCCAGGCAC-3'                  |                                  |                      |
| mAP-1-P-R                | 5'-TCGGGCA <u>AAGACTT</u> CT        | -1173~-1145                      | 65                   |
|                          | GGGCGGTGGCGGG-3'                    |                                  |                      |
| -3126-F <sup>3</sup>     | 5'- <b>TCTATCGATAGGTACC</b>         | -3127~-3105                      | 65                   |
|                          | TGAGGTCAGGTGTTTCGAGACC-3'           |                                  |                      |
| -280-R <sup>3</sup>      | 5'- <b>CCGGAATGCCAAGCTT</b>         | -261~-280                        | 65                   |
|                          | GGGGCCGGGCCGAGCCCCAC-3'             |                                  |                      |

<sup>1</sup> mAP-1-D and mAP-1-P indicate mutations of distal and proximal AP-1 sites, respectively. F: forward primer and R: reverse primer.

<sup>2</sup> Sequences that were mutated are underlined.

<sup>3</sup> Details of these primers are presented in Supplementary Table S2.

**Supplementary Table S4.** Primer sequences used for PCR of ChIP and Re-IP assays.

| Primer Name <sup>1</sup> | Nucleotide Sequence                        | Annealing Temp. (°C) |
|--------------------------|--------------------------------------------|----------------------|
| -2896-F                  | 5'-CTGGATGATGGTGACAGTGG-3'                 | 55                   |
| -2730-F <sup>2</sup>     | 5'-TCTATCGATAGGTACCATGGGTAGTTGCCACCTTG-3'  | 55                   |
| -1271-F <sup>2</sup>     | 5'-TCTATCGATAGGTACCGTTCCCCATGGCCTGGAG-3'   | 65                   |
| -1100-F                  | 5'-GGTTGGCTAGGGAGTGATGG-3'                 | 65                   |
| -2710-R                  | 5'-CAAGGTGGCAACTACCCATG-3'                 | 65                   |
| -2477-R                  | 5'-GCCTGAATCCAATAGCACGG-3'                 | 65                   |
| -1080-R                  | 5'-CCATCACTCCCTAGCCAACC-3'                 | 60                   |
| -1003-R <sup>2</sup>     | 5'-CCGGAATGCCAAGCTTTTTCCTTTGATTCCCTCTCG-3' | 60                   |

<sup>1</sup> Each primer was named based on the 5'-end nucleotide position of the PAOX promoter that annealed to each primer. The 1st nucleotide upstream of the start codon was referred to as -1. F: forward primer and R: reverse primer.

<sup>2</sup> Details of these primers are presented in Supplementary Table S2.

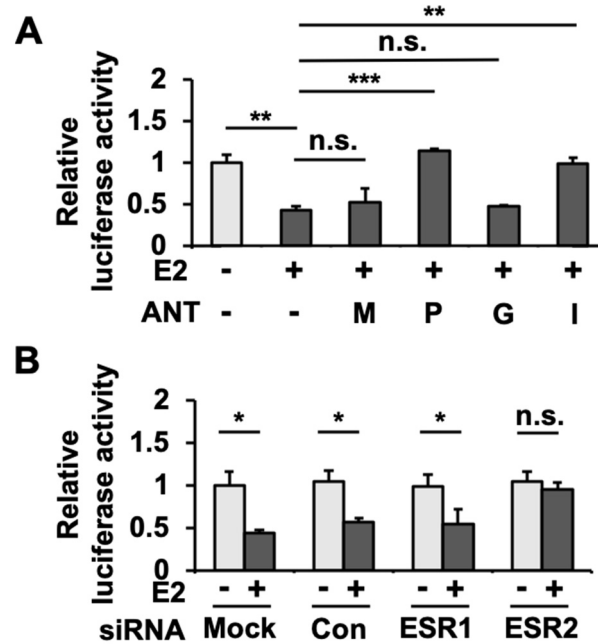

**Supplementary Figure S1.** Reduction in PAOX promoter activity by E2 is mediated by ESR2.

MCF-7 cells were co-transfected with the pGL3-Enhancers-PAOX promoter (-3126/-280), and pRL-TK in the absence or presence of E2 and with MPP (M; 100  $\mu$ M), PHTPP (P; 100  $\mu$ M), G-15 (G; 100  $\mu$ M), or ICI182.780 (I; 100  $\mu$ M) (A), or with siRNA for Con (scrambled), ESR1, or ESR2 knockdown (B). Luciferase assays were performed as described above. Data are shown as the mean  $\pm$  S.D. (n = 3), normalized to *Renilla* luciferase activity. \*,  $p < 0.05$ ; \*\*,  $p < 0.01$ ; and \*\*\*,  $p < 0.001$  versus the PAOX promoter activity in the presence or in the absence of E2.
